# Supplementary material
Source: publisher site journal article supplement (https://www.dovepress.com/article/267261)
Supplement: Supplementary file 1 [file get_supplementary_file.php]

**Annex III: Questionnaire**

**Dear Sir/madam,**

The COVID-19 pandemic is the defining global health crisis and the greatest challenge we have faced. The prevention of the crisis involves the participation of entire community. Furthermore, the outbreak is stressful for people around the world since it is declared as pandemic by world health organization (WHO). Following the wide spread of COVID-19 in Africa region and Ethiopia, concern have been raised on safeguarding the health professionals as they are highly vulnerable to the outbreak. Unprecedented spread of the infection largely affected the health professionals and generated shortage.

**Purpose of the study**: This study is designed to assess the risk perception, knowledge and precautionary behavioral response of clinicians and academicians working at different Ethiopian University hospitals towards the COVID-19. The result will be used as a guide for the public health policymakers

**Who approved the study:** The study is approved by Institutional Review Board of Jimma University with letter reference number with letter reference number IRB000212/2020.

**By clicking the below link, you agree to participate voluntarily in this survey and given your consent to use your anonymous data for research.**

You may exit the survey at any stage, and no compensation will be provided.

**Contact address for any question and inquiry:**

[shimelisgirma@gmail.com](mailto:shimelisgirma@gmail.com) or [liyew2003@gmail.com](mailto:liyew2003@gmail.com) or [gberessa@gmail.com](mailto:gberessa@gmail.com) or [arefeaynealenko@gmail.com](mailto:arefeaynealenko@gmail.com) or [yonastesfaye71@yahoo.com](mailto:yonastesfaye71@yahoo.com)

**Thank you in advance!**

Novel Coronavirus (SAR-COV-19): What we know about it?

Part I: Sociodemographic characteristics

Q1. What is your gender?

- Male
- Female

Q2. What is your age (full years) ____________________

Q3. What is the type of your profession?_________________________

Q4. What is the level of your educational status?

- Diploma
- Bachelor Degree
- Masters degree
- PhD and above

Q5. What is your professional engagement (more than one response is possible)

- Clinical
- Academics

Q6. Where is your area of residence?

- Urban
- Rural

**Part II: Source of information about novel Coronavirus (SAR-COV-19) outbreak**

Q7. Have you heard of Novel Coronavirus?

- Yes (1)
- No (2)

Q8. How do you rate the sources of information you are using about the Novel Coronavirus (SAR-COV-19) outbreak?

Instruction: on a scale of 1 "least used sources" to 4 "most used sources", rate your response by ticking on the response for each question.

|  | Least used (1) | Sometimes (2) | More often (3) | Most used (4) |
| --- | --- | --- | --- | --- |
| Printed material |  |  |  |  |
| Social media (Facebook, Twitter, Whatsapp, YouTube, Instagram) |  |  |  |  |
| Official government websites (MOH, DHA, DOH, WHO, CDC) |  |  |  |  |
| Radio |  |  |  |  |
| Television |  |  |  |  |
| Family member, colleague or friend (4) |  |  |  |  |

**Part III: Question related precautionary behavioral practice towards novel coronavirus (SAR-COV-19)**

Q9. How do you rate your precautionary behavioral practice ( for question number xx to xxx) toward novel coronavirus (SAR-COV-19) outbreak?

**Instruction**: on a scale of 1 "least used" to 5 "all the time", how do you rate your precautionary behavioral practice ( for question number xx to xxx) toward novel coronavirus (SAR-COV-19) outbreak?

| Questions | Least frequently (1) | Sometimes (2) | More often (3) | Most used (4) | All the time (5) |
| --- | --- | --- | --- | --- | --- |
| 9.1.How often do you avoid people sneezing or coughing? |  |  |  |  |  |
| 9.2. How often do you avoid large gathering? |  |  |  |  |  |
| 9.3. How often do you avoid touching face, mouth, eye and nose? |  |  |  |  |  |
| 9.4. How often do you wash hands frequently? |  |  |  |  |  |
| 9.5. How often do you avoid public places/public transportation? |  |  |  |  |  |
| 9.6. How often do you avoid travel to affected areas? |  |  |  |  |  |
| 9.7. How often do you use alcohol based disinfectant? |  |  |  |  |  |
| 9.8. How often do you avoid spitting on the ground? |  |  |  |  |  |
| 9.9. How often are you wearing a mask? |  |  |  |  |  |
| 9.10. How often are you wearing gloves? |  |  |  |  |  |

**Part IV: Novel coronavirus (SAR-COV-19) knowledge related questions**

Q10. What type of micro-organism responsible to cause is responsible to cause (SAR-COV-19)?

- Bacteria
- Fungus
- Virus
- Protozoa
- I don’t know

Q11. The COVID-19 virus spreads via respiratory droplets of infected individuals

- Correct (1)
- Incorrect (2)

Q12. Eating or contacting wild animals would result in the infection by the COVID-19 virus.

- Correct (1)
- Incorrect (2)

Q13. Persons with COVID-19 cannot infect the virus to others when a fever is not present.

- Correct (1)
- Incorrect (2)

Q14. What is the incubation period of Novel coronavirus (SAR-COV-19)?

- 2-7 days
- 2-14 days
- 7-14 days
- 7-21 days
- I don’t know

Q15. What are the symptoms of novel coronavirus (SAR-COV-19)? (More than one response is possible)

- Headache (1)
- Fever (2)
- Cough (3)
- Myalgia (4)
- Sore throat and runny nose (5)
- I don’t know (6)

Q16. What are the complications of Novel Coronavirus (SAR-COV-19)? (More than one response is possible)

- No complication (1)
- Pneumonia (2)
- Respiratory failure (3)
- Death (4)
- I don’t know

Q17. What is the treatment of Novel coronavirus (SAR-COV-19)? (More than one response is possible)

- Supportive care (1)
- Antiviral therapy (2)
- Vaccination (3)
- I don’t know (4)

Q18. Proper washing hand with soap and water is one method of preventing COVID-19.

- Correct (1)
- Incorrect (2)

Q19. One way of prevention of COVID 19 is not touching the eye, nose by unwashed hands.

- Correct (1)
- Incorrect (2)

Q20. To prevent the infection by COVID-19, individuals should avoid going to crowded places such as train stations and avoid taking public transportations.

- Correct (1)
- Incorrect (2)

Q21. Ordinary residents can wear general medical masks to prevent the infection by the COVID-19 virus.

- Correct (1)
- Incorrect (2)

Q22. People who have contact with someone infected with the COVID-19 virus should be immediately isolated in a proper place.

- Correct (1)
- Incorrect (2)

Q23. People who have contact with someone infected with the COVID-19 virus should be immediately isolated in a proper place.

- Correct (1)
- Incorrect (2)

Q24. Isolation and treatment of people who are infected with the COVID-19 virus are effective ways to reduce the spread of the virus.

- Correct (1)
- Incorrect (2)

Rate your response for question number 25-26

| Questions | No (1) | Minimal (2) | Moderate (3) | High (4) | Very high (5) |
| --- | --- | --- | --- | --- | --- |
| 25. How do rate your perceived understanding of government implementation strategy of COVID-19 |  |  |  |  |  |
| 26. How do you perceive scientific understanding of the infection |  |  |  |  |  |
